# Supplementary material for: Influence on Therapeutic Decision Making of SPECT-CT for Different Regions of the Foot and Ankle
Source: Hindawi journal article supplement (doi:10.1155/2014/927576), 2014-01-01
Supplement: f1 [file 927576.f1.pdf]

|    | Pathology site | Sex | Age | Assumed diagnosis                   | SPECT-CT diagnosis           | Final treatment        |
|----|----------------|-----|-----|-------------------------------------|------------------------------|------------------------|
| 1  | Ankle joint    | m   | 56  | Ankle arthritis                     | Ankle and subtalar arthritis | Pantalar arthrodesis   |
| 2  |                | m   | 69  | Talus necrosis                      | Ankle and subtalar arthritis | Pantalar arthrodesis   |
| 3  |                | m   | 26  | Non union ankle joint               | Non union ankle joint        | Rearthrodesis          |
| 4  |                | m   | 46  | Ankle arthritis                     | Moderate ankle arthritis     | Conservative treatment |
| 5  |                | m   | 36  | Beginning ankle arthritis           | Ankle arthritis              | Ankle arthroscopy      |
|    |                |     |     | Ankle arthritis,<br>Osteochondrosis |                              |                        |
| 6  |                | f   | 42  | dissecans tali                      | Osteochondrosis dissecans    | Ankle arthroscopy      |
| 7  |                | m   | 53  | Ankle arthritis                     | Ankle arthritis              | Ankle arthrodesis      |
| 8  |                | f   | 68  | Painful hindfoot                    | Ankle arthritis              | Conservative treatment |
| 9  |                | m   | 57  | Painful Ankle prosthesis            | Aseptic loosening            | Ankle arthrodesis      |
|    |                |     |     | Osteochondrosis                     |                              |                        |
| 10 |                | m   | 31  | dissecans tali                      | No essential pathology       | Ankle arthroscopy      |
| 11 |                | m   | 63  | Ankle arthritis                     | Ankle arthritis              | Ankle arthrodesis      |
| 12 |                | m   | 81  | Painful hindfoot                    | Ankle arthritis              | Ankle prosthesis       |
| 13 |                | m   | 50  | Osteochondral lesion                | Moderate ankle arthritis     | Conservative treatment |
|    |                |     |     |                                     |                              | Supramalleolar         |
| 14 |                | f   | 55  | Ankle arthritis                     | Medial ankle arthritis       | osteotomy              |
| 15 |                | m   | 33  | Ankle arthritis                     | Ankle arthritis              | Ankle arthroscopy      |
| 16 |                | f   | 30  | Ankle arthritis                     | Moderate ankle arthritis     | Ankle arthrodesis      |
| 17 |                | f   | 47  | Ankle arthritis                     | Ankle arthritis              | Ankle prosthesis       |
| 18 |                | m   | 40  | Ankle arthritis                     | Ankle arthritis              | Ankle arthrodesis      |
| 19 |                | m   | 40  | Ankle arthritis                     | Ankle arthritis              | Ankle arthrodesis      |
| 20 |                | f   | 83  | Ankle and subtalar arthritis        | Ankle arthritis              | Conservative treatment |
| 21 |                | m   | 44  | Painful hindfoot                    | Ankle arthritis              | Conservative treatment |
| 22 |                | m   | 57  | Ankle and subtalar arthritis        | Ankle arthritis              | Ankle arthrodesis      |
| 23 |                | f   | 65  | Painful hindfoot                    | Ankle arthritis              | Ankle arthrodesis      |
| 24 |                | f   | 63  | Painful hindfoot                    | Ankle arthritis              | Ankle arthrodesis      |
| 25 |                | f   | 51  | Ankle arthritis                     | Ankle arthritis              | Ankle arthrodesis      |
| 26 |                | m   | 33  | Osteochondral lesion                | Osteochondral lesion         | Conservative treatment |
|    |                |     |     |                                     |                              | Supramalleolar         |
| 27 |                | f   | 42  | Medial ankle arthritis              | Osteochondral lesion         | osteotomy              |
| 28 |                | m   | 40  | Ankle arthritis                     | Osteochondral lesion         | Ankle arthroscopy      |
| 29 |                | m   | 74  | Painful hindfoot                    | No essential pathology       | Conservative treatment |

|    |                         |    |                                                                                                  |                             |                                                                     |
|----|-------------------------|----|--------------------------------------------------------------------------------------------------|-----------------------------|---------------------------------------------------------------------|
| 30 | f                       | 49 | Ankle arthritis<br>Osteochondrosis                                                               | Ankle arthritis             | Ankle arthrodesis                                                   |
| 31 | f                       | 65 | dissecans tali                                                                                   | No essential pathology      | Conservative treatment                                              |
| 32 | <b>Subtalar joint</b> f | 79 | Non union subtalar joint<br>Plantar fasciitis, DD                                                | No essential pathology      | Conservative treatment                                              |
| 33 | f                       | 34 | Subtalar arthritis                                                                               | No essential pathology      | Conservative treatment                                              |
| 34 | f                       | 52 | Pes varus                                                                                        | Moderate subtalar arthritis | Calcaneal osteotomy                                                 |
| 35 | m                       | 59 | Subtalar Arthritis                                                                               | Subtalar arthritis          | Subtalar arthrodesis                                                |
| 36 | f                       | 24 | Pes planovalgus                                                                                  | Subtalar arthritis          | Double arthrodesis                                                  |
| 37 | f                       | 41 | Painful hindfoot                                                                                 | Subtalar arthritis          | Subtalar arthrodesis                                                |
| 38 | f                       | 81 | Pes planovalgus                                                                                  | Subtalar and TN arthritis   | Triple arthrodesis                                                  |
| 39 | m                       | 55 | Ankle arthritis                                                                                  | Subtalar arthritis          | Subtalar arthrodesis                                                |
| 40 | f                       | 42 | Coalitio talocalcaneare                                                                          | Coalitio talocalcaneare     | Resection Coalitio                                                  |
| 41 | f                       | 53 | Subtalar Arthritis                                                                               | Subtalar arthritis          | Subtalar arthrodesis                                                |
| 42 | m                       | 43 | Pes planovalgus                                                                                  | Coalitio talocalcaneare     | Subtalar arthrodesis                                                |
| 43 | f                       | 57 | Subtalar Arthritis                                                                               | Subtalar arthritis          | Subtalar arthrodesis                                                |
| 44 | m                       | 25 | Non union subtalar joint                                                                         | No essential pathology      | Conservative treatment                                              |
| 45 | f                       | 80 | Subtalar Arthritis                                                                               | Subtalar arthritis          | Conservative treatment                                              |
| 46 | m                       | 42 | Ankle arthritis                                                                                  | Subtalar arthritis          | Subtalar arthrodesis                                                |
| 47 | m                       | 58 | Pes planovalgus                                                                                  | Subtalar and CC arthritis   | Triple arthrodesis                                                  |
| 48 | m                       | 47 | Ankle and subtalar arthritis                                                                     | Subtalar arthritis          | Subtalar arthrodesis                                                |
| 49 | f                       | 73 | Pes planovalgus                                                                                  | Subtalar and TN arthritis   | Triple arthrodesis                                                  |
| 50 | f                       | 77 | Painful hindfoot                                                                                 | Moderate subtalar arthritis | Conservative treatment                                              |
| 51 | m                       | 46 | Subtalar Arthritis<br>Subtalar Arthritis after                                                   | Subtalar arthritis          | Subtalar arthrodesis                                                |
| 52 | m                       | 45 | ankle arthrodesis                                                                                | Subtalar arthritis          | Pantalar arthrodesis                                                |
| 53 | f                       | 66 | Non union subtalar joint                                                                         | Implant associate reaction  | Implant removal                                                     |
| 54 | f                       | 62 | Painful hindfoot<br>TN-arthritis, DD Coalitio TN-arthritis, CC- arthritis<br>calcaneonaviculare, | No essential pathology      | Subtalar arthrodesis<br>Conservative treatment,<br>weight reduction |
| 55 | <b>Chopart joint</b> f  | 16 | Adipositas                                                                                       |                             |                                                                     |
| 56 | f                       | 51 | Ankle instability                                                                                | Cyst os naviculare          | TN arthrodesis                                                      |
| 57 | f                       | 42 | CC arthritis                                                                                     | No essential pathology      | Conservative treatment                                              |
| 58 | f                       | 83 | Chopart arthritis                                                                                | Moderate CC arthritis       | Conservative treatment                                              |
| 59 | f                       | 27 | Non union TN joint<br>TN arthritis after subtalar                                                | No essential pathology      | Conservative treatment                                              |
| 60 | f                       | 58 | arthrodesis                                                                                      | TN arthritis                | TN arthrodesis                                                      |

|    |                       |    |                               |                               |                           |               |
|----|-----------------------|----|-------------------------------|-------------------------------|---------------------------|---------------|
| 61 | f                     | 60 | Painful hindfoot              | TN arthritis                  | TN arthrodesis            |               |
| 62 | m                     | 36 | TN arthritis                  | TN arthritis                  | TN arthrodesis            |               |
| 63 | f                     | 47 | Pes cavovarus                 | TN arthritis                  | TN arthrodesis            |               |
| 64 | f                     | 56 | Pes planovalgus               | TN and CC arthritis           | TN and NC arthrodesis     |               |
| 65 | f                     | 63 | Painful hindfoot              | No essential pathology        | Conservative treatment    |               |
| 66 | f                     | 66 | Painful hindfoot              | Cyst Os naviculare            | TN arthrodesis            |               |
| 67 | f                     | 68 | TN arthritis                  | No essential pathology        | Conservative treatment    |               |
| 68 | m                     | 54 | Necrosis Os naviculare        | Stress reaction Os naviculare | Conservative treatment    |               |
| 69 | m                     | 62 | Midfoot arthritis             | TN arthritis                  | TN and NC arthrodesis     |               |
| 70 | f                     | 64 | Ankle arthritis               | TN arthritis                  | TN arthrodesis            |               |
| 71 | <b>Lisfranc joint</b> | m  | 53                            | Non union TMT I-III joint     | Non union TMT I-III joint | Rearthrodesis |
| 72 | m                     | 46 | TMT arthritis                 | No essential pathology        | Conservative treatment    |               |
| 73 | f                     | 71 | Pes planus                    | TMT I arthritis               | Conservative treatment    |               |
| 74 | f                     | 71 | Midfoot arthritis             | TMT II+III arthritis          | TMT I-III arthrodesis     |               |
|    |                       |    | Subtalar arthritis, TMT-I-III | TMT-II-III-arthritis          | TMT-II-III-fusion         |               |
| 75 | f                     | 63 | arthritis                     |                               |                           |               |
| 76 | f                     | 68 | Midfoot sprain                | TMT I-III arthritis           | TMT I-III arthrodesis     |               |
| 77 | f                     | 82 | Lisfranc arthritis            | TN and TMT arthritis          | TMT I-III arthrodesis     |               |
| 78 | m                     | 35 | Painful midfoot               | TN and TMT arthritis          | Conservative treatment    |               |
| 79 | f                     | 58 | Midfoot deformety             | TMT II arthritis              | TMT II+III arthrodesis    |               |
| 80 | f                     | 77 | Painful midfoot               | TN and TMT arthritis          | TMT I-III arthrodesis     |               |
| 81 | f                     | 56 | Non union metatarsal II       | TMT II arthritis              | TMT II arthrodesis        |               |
| 82 | f                     | 52 | Non union TMT I-III joint     | Implant associate reaction    | Implant removal           |               |
| 83 | m                     | 68 | TMT arthritis                 | TMT II+III arthritis          | TMT II+III arthrodesis    |               |
| 84 | f                     | 52 | Painful midfoot               | TMT I arthritis               | Conservative treatment    |               |
| 85 | f                     | 55 | TMT arthritis                 | TMT II+III arthritis          | Conservative treatment    |               |
| 86 | f                     | 63 | Painful midfoot               | TMT II+III arthritis          | TMT I-III arthrodesis     |               |

### Supplementary table

### Basic data

The clinical diagnosis, diagnosis of SPECT-CT and final treatment are demonstrated
